# Supplementary material
Source: PubMed Central journal article supplement (PMC8967632)
Supplement: 7554_3_supp_94853_r1qn67.pdf [file 7554_3_supp_94853_r1qn67.pdf]

1 *Supplementary data*

2 **Modelling and prevention of acute kidney injury through ischemia and reperfusion in a combined**  
 3 **human renal proximal tubule/blood vessel-on-a-chip**

4

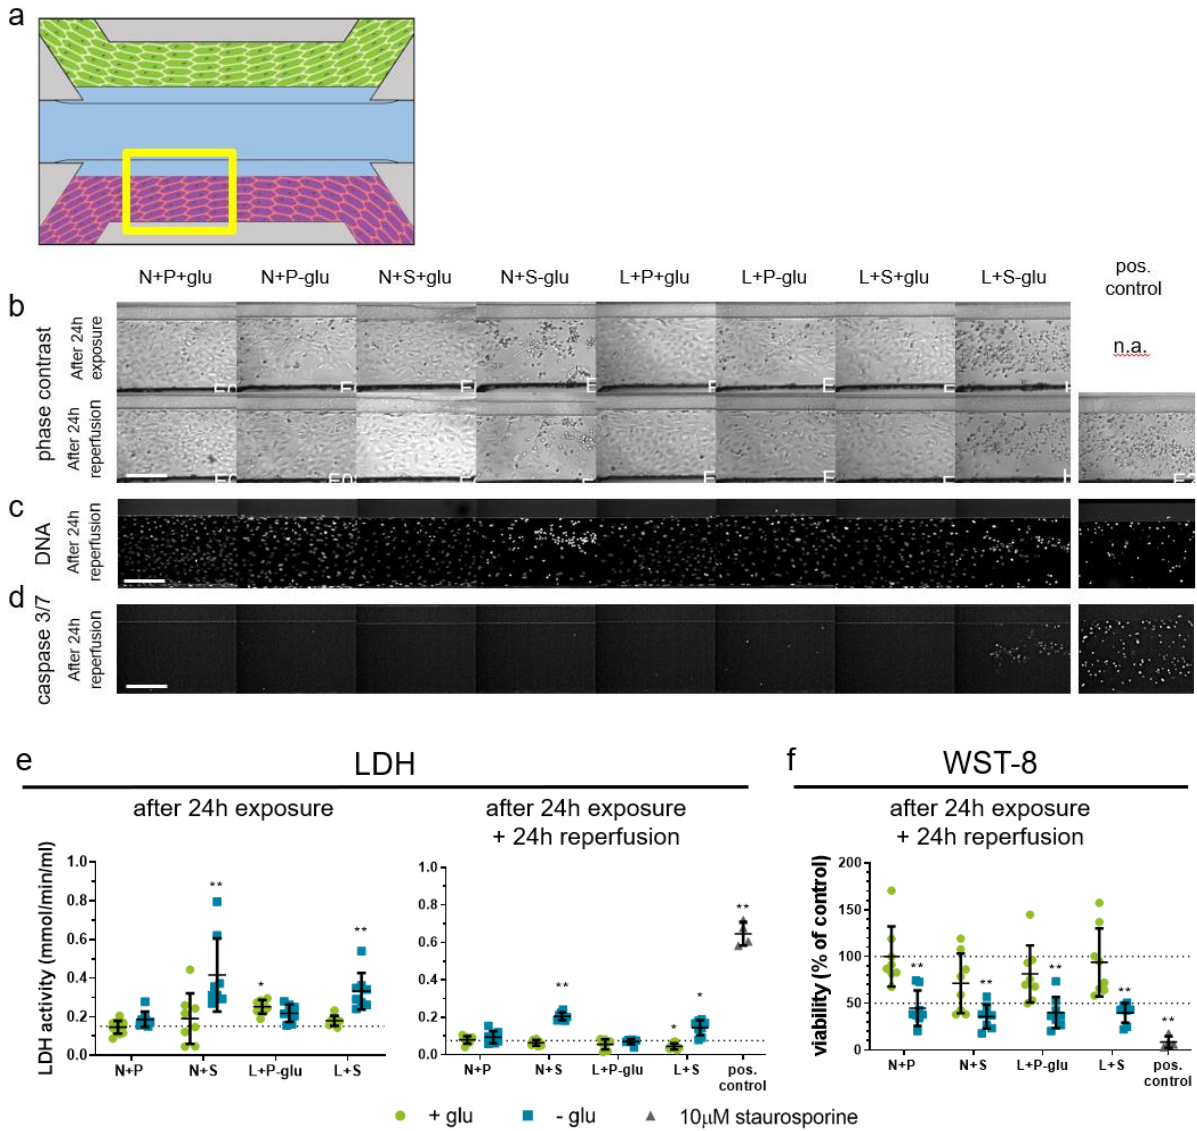

6

7 *Figure S1: Modelling AKI upon ischemic parameter exposure showing results of HUVEC. Ischemia was modelled on the*  
 8 *OrganoPlate by exposing the coculture to a combination of low oxygen (L), static incubation (S), and glucose and nutrient*  
 9 *poor medium (-glu) for 24-hours, followed by a 24h reperfusion in normoxia (N), perfusion on the rocker (P), and in glucose*  
 10 *and nutrient rich medium (+glu). a Region of the HUVEC vessel (yellow square) that is used for the images shown in b-d. b*  
 11 *Representative phase-contrast images after 24-hour exposure (top) and subsequent 24-hour reperfusion (bottom). Different*  
 12 *ischemia inducing conditions were tested (columns) and compared to the normal condition N+P+glu. N.a.= not available. c*  
 13 *DNA staining after 24h reperfusion. d Caspase 3-7 staining after 24h reperfusion. Scalebar = 200µm. e LDH release in the*  
 14 *medium was measured after 24h exposure (left) and 24h exposure plus 24h reperfusion (right) respectively. f WST-8 viability*  
 15 *relative to the normal condition N+P+glu was assessed after 24h reperfusion. 10µM staurosporine was included as a positive*  
 16 *control. Error bars represent standard deviation. One-way ANOVA compares the conditions to the N+P+glu control condition,*  
 17 *\*\* p<0.01 n=8-16 chips per condition.*

|  |  |  |
|--|--|--|
|  |  |  |
|--|--|--|

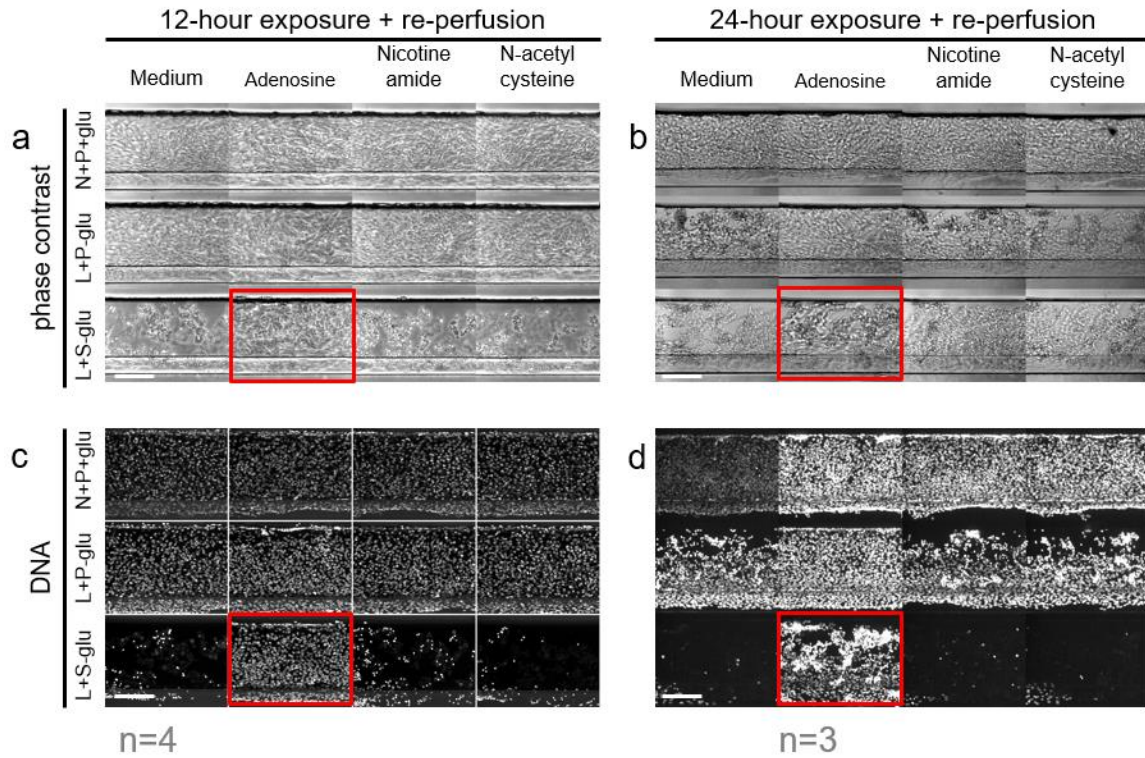

Representative images. Scalebar = 200  $\mu$ m.

N=normoxia, H=5% O<sub>2</sub>, R=rocker (perfusion), S=static (no perfusion), glu=glucose.

18

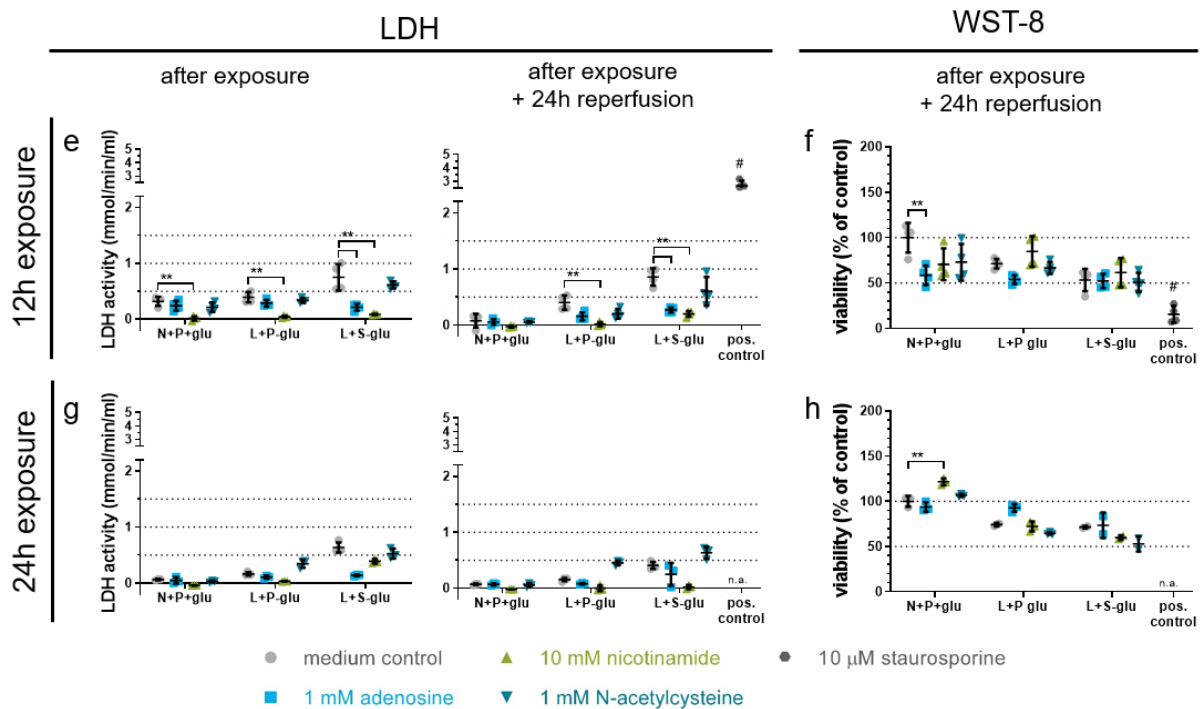

19

20 *Figure S2: Repetition of experimental data presented in figure 5 of the main text. Cultures were exposed to the selected*  
 21 *ischemic conditions L+P+glu and L+S+glu for either 12 or 24 hours, followed by a 24 hour reperfusion, in the presence*  
 22 *of adenosine, nicotinamide or N-acetylcysteine. N+P+glu medium only is the normoxic control condition. a-d A zoom of*  
 23 *the RPTC tubule (see Fig. 4b) was imaged after 12-hour exposure and reperfusion (a, c) or after 24-hour exposure and*  
 24 *reperfusion (b, d). Red squares indicate a protective effect of adenosine compared to the medium control of the same*  
 25 *ischemic condition in phase contrast imaging and DNA staining. Scalebar = 200 $\mu$ m. e-h After the ischemic exposure of*  
 26 *either 12 hours (e, f) or 24 hours (g, h) and a reperfusion of 24 hours for both, medium from the RPTC channel was*

|  |  |  |
|--|--|--|
|  |  |  |
|--|--|--|

27 activity (e, g) and WST-8 viability relative to the N+P+glu medium control (f, h) was determined. One-way ANOVA compares  
 28 the co-incubations to the medium control of the same ischemic condition, \*  $p < 0.05$ , \*\*  $p < 0.01$ . # indicates the positive control  
 29 differs significantly with all medium controls ( $p < 0.01$ ). Error bars represent the standard deviation. 10  $\mu\text{M}$  staurosporine was  
 30 included as a positive control.  $n=3-4$  chips per condition.

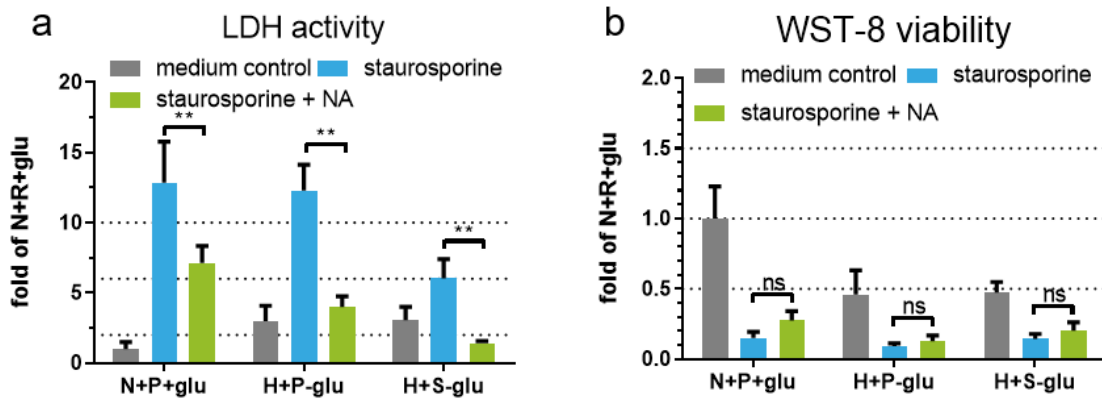

31

32 **Figure S3: LDH activity and WST-viability measured on cocultures exposed to staurosporine with and without co-incubation**  
 33 **of nicotinamide (NA).** **a** LDH activity was significant lower when cocultures exposed to staurosporine were co-incubated with  
 34 NA. **b** WST-8 viability was not significant higher when cocultures exposed to staurosporine were co-incubated with NA,  
 35 indicating no protective effect of NA. \*\*  $p < 0.01$ . ns: not significant. Error bars represent the standard deviation.  $n=4-8$  chips  
 36 per condition.

37

|  |  |  |
|--|--|--|
|  |  |  |
|--|--|--|
