# Supplementary material
Source: PubMed Central journal article supplement (PMC8967632)
Supplement: KID.0003622021SupplementaryData1.pdf [file KID.0003622021SupplementaryData1.pdf]

1 **Supplementary data**  
 2 **Modelling and prevention of acute kidney injury through ischemia and reperfusion in a combined**  
 3 **human renal proximal tubule/blood vessel-on-a-chip**  
 4

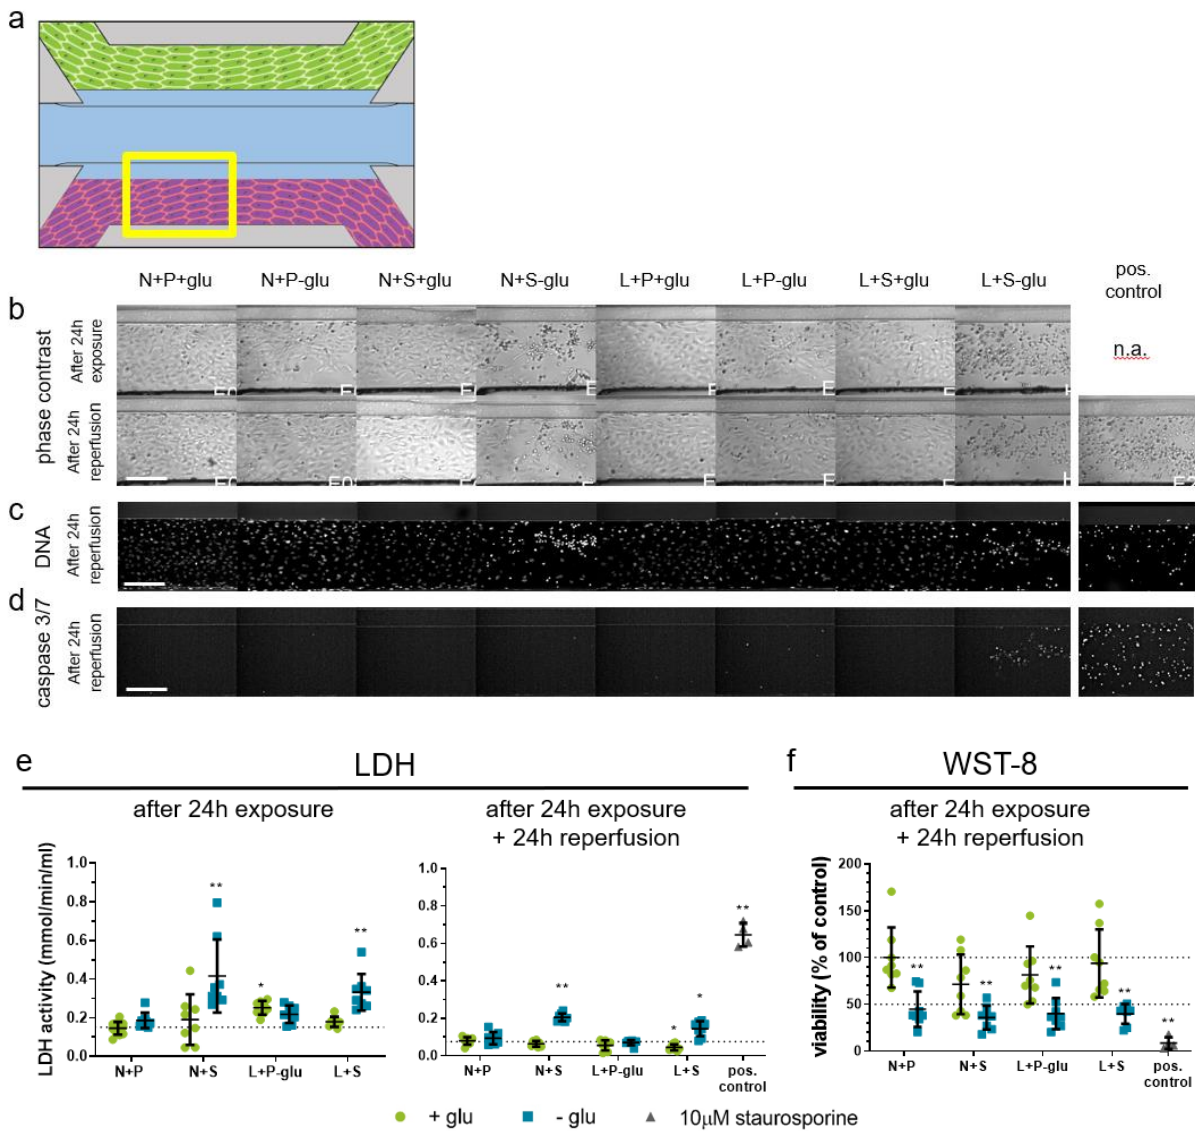

7 **Figure S1: Modelling AKI upon ischemic parameter exposure showing results of HUVEC.** Ischemia was modelled on the  
 8 **OrganoPlate** by exposing the coculture to a combination of low oxygen (L), static incubation (S), and glucose and nutrient  
 9 **poor medium (-glu)** for 24-hours, followed by a 24h reperfusion in normoxia (N), perfusion on the rocker (P), and in glucose  
 10 **and nutrient rich medium (+glu)**. **a** Region of the HUVEC vessel (yellow square) that is used for the images shown in b-d. **b**  
 11 **Representative phase-contrast images** after 24-hour exposure (top) and subsequent 24-hour reperfusion (bottom). Different  
 12 **ischemia inducing conditions** were tested (columns) and compared to the normal condition N+P+glu. N.a.= not available. **c**  
 13 **DNA staining** after 24h reperfusion. **d** **Caspase 3-7 staining** after 24h reperfusion. Scalebar = 200µm. **e** **LDH release** in the  
 14 **medium** was measured after 24h exposure (left) and 24h exposure plus 24h reperfusion (right) respectively. **f** **WST-8 viability**  
 15 **relative to the normal condition N+P+glu** was assessed after 24h reperfusion. 10µM staurosporine was included as a positive  
 16 **control**. Error bars represent standard deviation. One-way ANOVA compares the conditions to the N+P+glu control condition,  
 17 **\*\* p<0.01 n=8-16 chips per condition.**

18

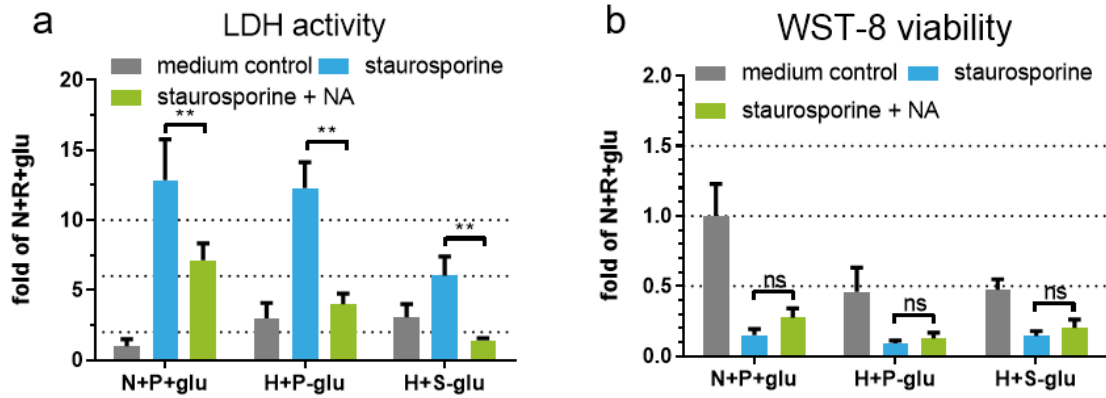

19

20 *Figure S2: LDH activity and WST-viability measured on cocultures exposed to staurosporine with and without co-incubation*  
 21 *of nicotinamide (NA). a LDH activity was significant lower when cocultures exposed to staurosporine were co-incubated with*  
 22 *NA. b WST-8 viability was not significant higher when cocultures exposed to staurosporine were co-incubated with NA,*  
 23 *indicating no protective effect of NA. \*\* p<0.01. ns: not significant. Error bars represent the standard deviation. n=4-8 chips*  
 24 *per condition.*

25

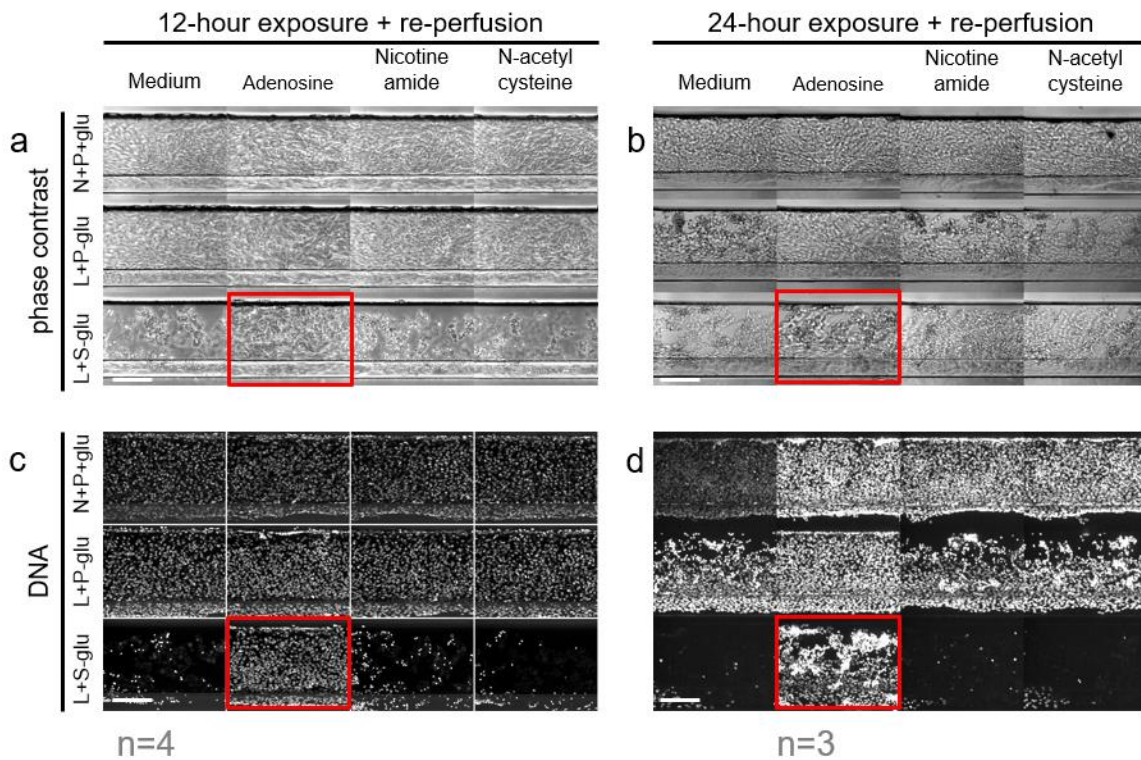

Representative images. Scalebar = 200  $\mu$ m.

N=normoxia, H=5% O<sub>2</sub>, R=rocker (perfusion), S=static (no perfusion), glu=glucose.

26

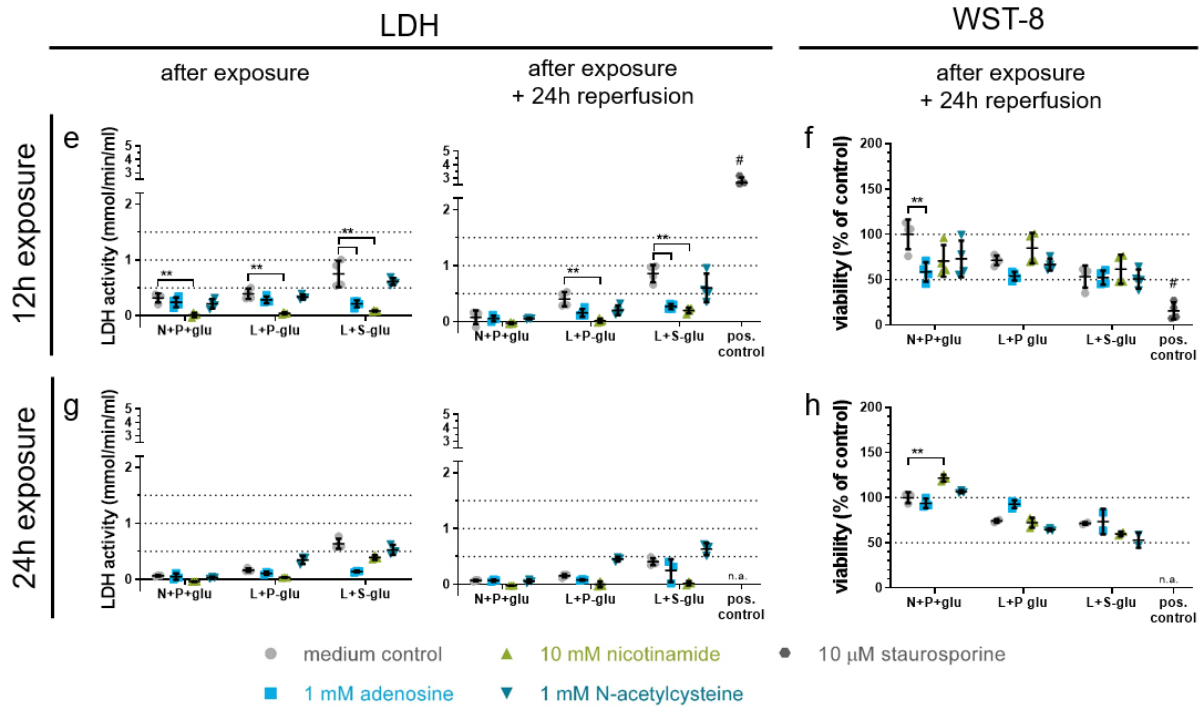

27

28 *Figure S3: Repetition of experimental data presented in figure 5 of the main text. Cultures were exposed to the selected*  
 29 *ischemic conditions L+P-glu and L+S-glu for either 12 or 24 hours, followed by a 24 hour reperfusion, in the presence of*  
 30 *adenosine, nicotinamide or N-acetylcysteine. N+P+glu medium only is the normoxic control condition. a-d A zoom of the*  
 31 *RPTC tubule (see Fig. 4b) was imaged after 12-hour exposure and reperfusion (a, c) or after 24-hour exposure and reperfusion*  
 32 *(b, d). Red squares indicate a protective effect of adenosine compared to the medium control of the same ischemic condition*  
 33 *in phase contrast imaging and DNA staining. Scalebar = 200μm. e-h After the ischemic exposure of either 12 hours (e, f) or 24*  
 34 *hours (g, h) and a reperfusion of 24 hours for both, medium from the RPTC channel was sampled and analyzed for LDH*  
 35 *activity (e, g) and WST-8 viability relative to the N+P+glu medium control (f, h) was determined. One-way ANOVA compares*  
 36 *the co-incubations to the medium control of the same ischemic condition, \* p < 0.05, \*\* p < 0.01. # indicates the positive control*  
 37 *differs significantly with all medium controls (p < 0.01). Error bars represent the standard deviation. 10 μM staurosporine was*  
 38 *included as a positive control. n=3-4 chips per condition.*

39
